# Supplementary material for: Quality-by-Design R&D of a Novel Nanozyme-Based Sensor for Saliva Antioxidant Capacity Evaluation
Source: MDPI journal article supplement (doi:10.3390/antiox12051120), 2023-05-18
Supplement: s1 [file s1]

## Quality by Design R&D of a Novel Nanozyme Based Sensor for Saliva Antioxidant Capacity Evaluation—Supplementary Information

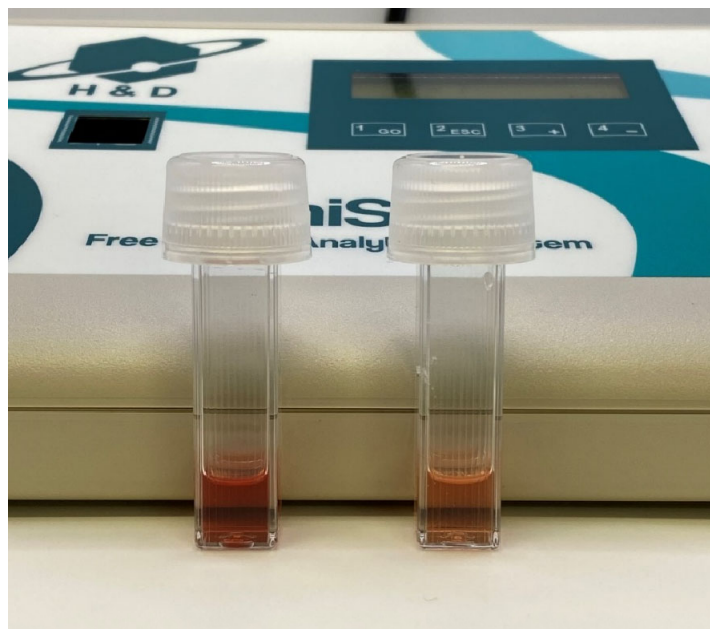

**Figure S1.** Validation against state-of-the-art SAT test. Benchtop spectrophotometer (MiniSAT) in the background, and color shift induced by the addition of ascorbic acid to the cuvette filled with reagents in the foreground.
